# Supplementary material for: Efficient electrochromic performance of nanoparticulate WO3 thin films
Source: Royal Society of Chemistry journal article supplement (doi:10.1039/c3tc30378k), 2013-01-01
Supplement: c3tc30378k.pdf [file c3tc30378k.pdf]

## Supporting Information

### Efficient Electrochromic Device Based on Nanoparticulate WO<sub>3</sub> Thin Films

*Dhanaji S. Dalavi<sup>a</sup>, Rupesh S. Devan<sup>b</sup>, Ranjit A. Patil,<sup>b</sup> Raghunath S. Patil<sup>c</sup>, Yuan-Ron. Ma,<sup>b</sup>  
Shivaji B. Sadale<sup>d</sup>, In-Young Kim<sup>e</sup>, Jin-Hyeok Kim<sup>e</sup>, Pramod S. Patil<sup>\*a,e</sup>*

<sup>a</sup>Thin Film Materials laboratory, Department of Physics, Shivaji University,  
Kolhapur - 416004, M.S., India, Fax: +91-231-2691533; Tel: +91-231-2609420

<sup>b</sup>Department of Physics, National Dong Hwa University, Hualien 97401, Taiwan

<sup>c</sup>Department of Physics, The New College, Kolhapur - 416012, India

<sup>d</sup>Department of Technology, Shivaji University, Kolhapur

<sup>e</sup>Dept. of Materials Science, Chonnam National University, Gwangju, 500-757, South  
Korea. E-mail: psp\_phy@unishivaji.ac.in; jinhyeok@chonnam.ac.kr

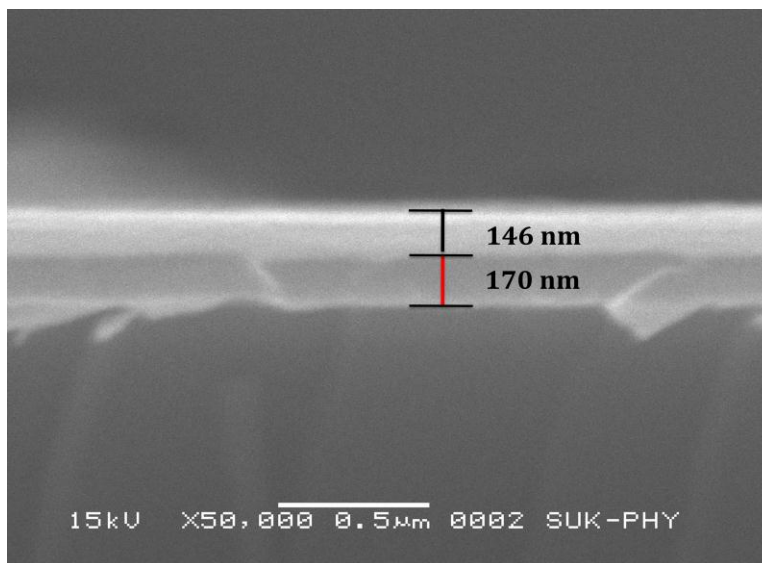

Fig.S1 Side view of WO<sub>3</sub> thin film deposited on ITO coated conducting glass substrate.

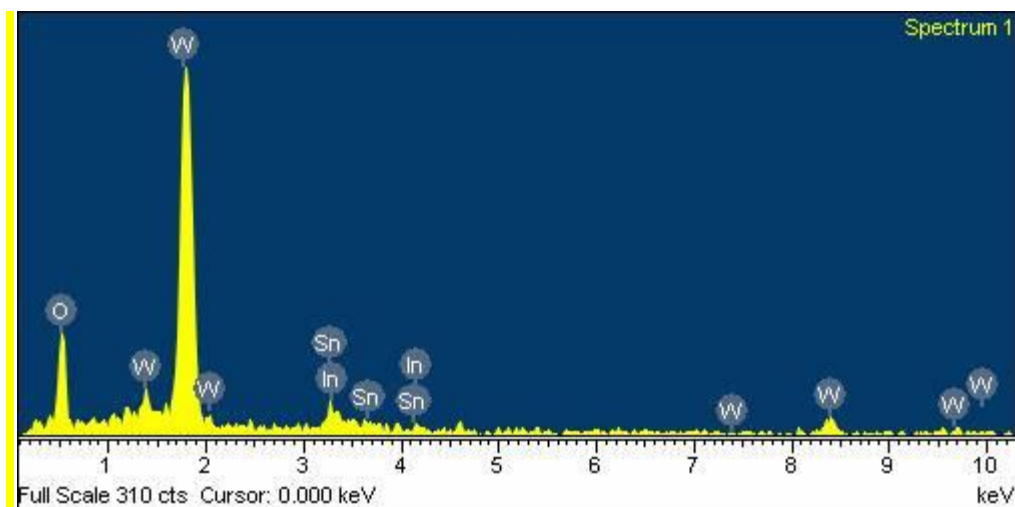

Fig.S2 Energy-dispersive X-ray spectrum of NP-WO<sub>3</sub> thin film

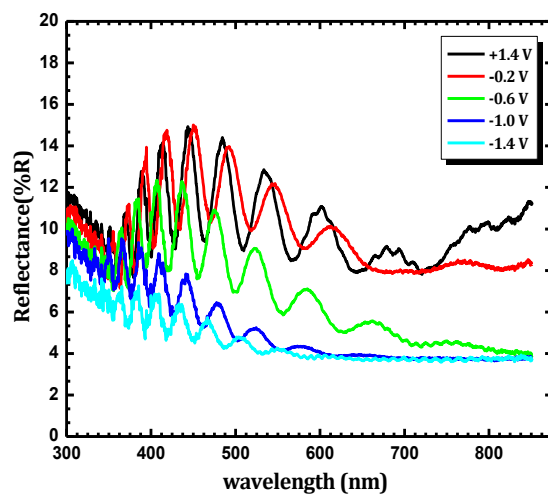

Fig.S3 Measured spectral reflectance for NP-WO<sub>3</sub> thin film as a function of applied potentials

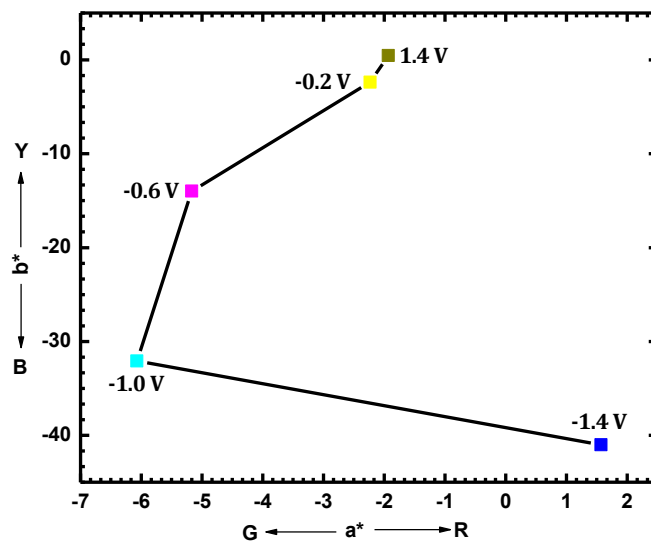

Fig. S4 ( $a^*$ ,  $b^*$ ) showing the hue and saturation for NP- $\text{WO}_3$  thin film at different applied potentials,  $a^*$ = red (+) /green (-), and  $b^*$ =yellow (+) /blue (-).

### XPS Analysis

**Table 2** – Peak positions, FWHMs and Area under peaks of the decomposed W (4f) XPS spectra of shown in Fig. 3 (a and b).

| Bleached State        |      | Colored State         |      |
|-----------------------|------|-----------------------|------|
| Peak Position (eV)    | FWHM | Peak Position (eV)    | FWHM |
| 35.89 $\text{W}^{6+}$ | 1.25 | 35.66 $\text{W}^{6+}$ | 1.27 |
| 38.00 $\text{W}^{6+}$ | 1.26 | 37.76 $\text{W}^{6+}$ | 1.32 |
| 34.61 $\text{W}^{5+}$ | 1.00 | 34.34 $\text{W}^{5+}$ | 1.23 |
| 36.98 $\text{W}^{5+}$ | 0.5  | 36.89 $\text{W}^{5+}$ | 0.56 |
